# Supplementary material for: Age-Varying Distinct Neuroanatomy in Young Children with Autism Spectrum Disorder and Fragile X Syndrome
Source: Research Square preprint supplement (doi:10.21203/rs.3.rs-7070338/v1), 2025-07-31

Supplementray Materials for

Age-Varying Distinct Neuroanatomy in Young Children with Autism Spectrum Disorder and Fragile X Syndrome

# Tables and Figures

**Table 1.** VBM cluster level results with ANOVA and tfce+permutation correction. Columns in the table indicate the significant clusters, the brain regions in each cluster, the FWE-corrected *p* value of each cluster, the clusters’ size (in number of voxels), TFCE values and MNI coordinates of the peak voxel in clusters, respectively.

| **Cluster** | **Brain regions** | ***p* value** | **#voxels** | **Peak TFCE** | **MNI (x, y, z)** |
| --- | --- | --- | --- | --- | --- |
| **FXS<ASD** |  |  |  |  |  |
| Rolandic insula (L) | Left rolandic operculum, insula | <0.001 | 1767 | 3920 | -42, -4, 12 |
| Rolandic insula (R) | Right rolandic operculum, insula | <0.001 | 1324 | 1884 | 38, -4, 9 |
| Vermis VIII/IX | Cerebellum vermis VIII/IX | 0.003 | 775 | 1241 | 2, -69, -45 |
| Lobule VIII/IX (L) | Left cerebellum lobule VIII/IX | 0.001 | 774 | 1751 | -24, -57, -45 |
| Frontal insula (L) | Left insula, inferior frontal gyrus | 0.001 | 569 | 1692 | -27, 32, -3 |
| Calcarine (L) | Left calcarine, precuneus | 0.004 | 419 | 1131 | -14, -57, 12 |
| Lobule VIII/IX (R) | Right cerebellum lobule VIII/IX | 0.009 | 382 | 884 | 20, -58, -44 |
| Hippocampus (R) | Right hippocampus | 0.01 | 297 | 876 | 36, -38, 3 |
| Amygdala (L) | Left amygdala, superior temporal gyrus | 0.002 | 263 | 1405 | -27, 2, -18 |
| **FXS > ASD** |  |  |  |  |  |
| Subcortical | Caudate, Putamen, Thalamus, Pallidum | <0.001 | 12003 | 42097 | -12, 15, 6 |
| Crus I (R) | Right cerebellum crus I | 0.001 | 6170 | 13430 | 33, -81, -22 |
| Crus I (L) | Left cerebellum crus I | 0.002 | 4491 | 5950 | -32, -76, -24 |
| **FXS>TD** |  |  |  |  |  |
| Subcortical | Caudate, Putamen, Thalamus, Pallidum | <0.001 | 12003 | 22243 | -10, 14, 2 |
| Crus I (R) | Right cerebellum crus I | <0.001 | 6167 | 16292 | 33, -81, -24 |
| Crus I (L) | Left cerebellum crus I | 0.001 | 4491 | 4387 | -36, -78, -24 |
| **FXS<TD** |  |  |  |  |  |
| Rolandic insula (L) | Left rolandic operculum, insula | <0.001 | 1767 | 3659 | -45, -4, 14 |
| Rolandic insula (R) | Right rolandic operculum, insula | <0.001 | 1324 | 2106 | 60, -6, 16 |
| Vermis VIII/IX | Cerebellum vermis VIII/IX | 0.001 | 775 | 1580 | 2, -56, -33 |
| Lobule VIII/IX (L) | Left cerebellum lobule VIII/IX | <0.001 | 774 | 1723 | -24, -52, -45 |
| Frontal insula (L) | Left insula, inferior frontal gyrus | 0.005 | 569 | 847 | -28, 32, 9 |
| Calcarine (L) | Left calcarine, precuneus | 0.006 | 418 | 812 | -26, -64, 16 |
| Lobule VIII/IX (R) | Right cerebellum lobule VIII/IX | 0.003 | 383 | 982 | 22, -54, -44 |
| Hippocampus (R) | Right hippocampus | 0.01 | 297 | 613 | 33, -36, -2 |
| Amygdala (L) | Left amygdala, superior temporal gyrus | 0.015 | 231 | 504 | -30, 0, -18 |

**Table 2.**  VBM cluster level results of ASD vs. TD. Columns in the table indicate the significant clusters, the brain regions in each cluster, the FWE-corrected *p* value of each cluster, the clusters’ size (in number of voxels), TFCE values and MNI coordinates of the peak voxel in clusters, respectively.

| **Cluster** | **Brain regions** | ***p* value** | **#voxel** | **Peak TFCE** | **MNI (x, y, z)** |
| --- | --- | --- | --- | --- | --- |
| **ASD>TD** |  |  |  |  |  |
| Temporal (R) cluster | Temporal_Pole_Sup_R, Temporal_Sup_R,  Temporal_Pole_Mid_R,  Insula_R | <0.001 | 5869 | 1517 | 44, 2, -10 |
| Temporal (L) cluster | Temporal_Mid_L,  Temporal_Pole_Mid_L,  Temporal_Sup_L,  Temporal_Inf_L | <0.001 | 3546 | 1378 | -56, -2, -24 |
| Insula (R) cluster | Insula_R,  Rolandic_Oper_R | <0.001 | 388 | 1045 | 36, -10, 12 |

**Figure 1.** Post-hoc comparisons between ASD and TD group without limitation of the ANOVA mask, FWE corrected. The colorbar denotes the TFCE value.


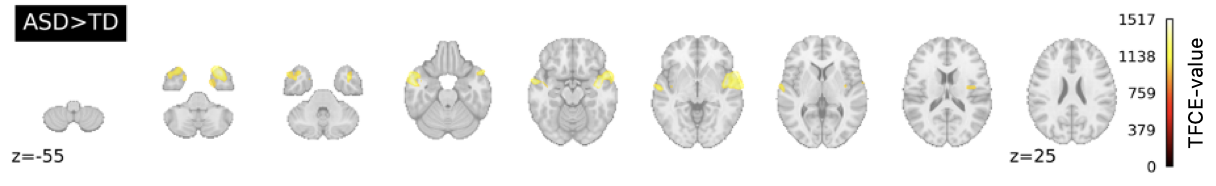

Supplement: Supplementary file 1 [file 70ebec8e0a6452ccb287f683.docx]
